# Supplementary material for: Giardia duodenalis (Styles, 1902) in Cattle: Isolation of Calves with Diarrhoea and Manure Treatment in the Lagoon Presented as Risk Factors in Latvian Herds
Source: MDPI journal article supplement (doi:10.3390/microorganisms11092338), 2023-09-18
Supplement: s1 [file s1]

ID NR \_\_\_\_\_

Date \_\_\_\_\_

### Consent form

Farm owner is kindly asked to fill out questionnaire. Questionnaire is anonymous, no sensitive data about farm will be shared with the public.

I agree, that freshly defecated feaces are collected from cows on my farm. \_\_\_\_\_/date, signature/

☐

E-mail for results \_\_\_\_\_

**Farm number:** \_\_\_\_\_

**Herd number:** \_\_\_\_\_

ID NR \_\_\_\_\_

Date \_\_\_\_\_

## Questionnaire about herd management

Please, choose correct answer, only one answer is possible, unless stated otherwise.

1. **Region** \_\_\_\_\_
2. **County** \_\_\_\_\_
3. **No. of animals in herd:** \_\_\_\_\_
4. **Herd type:**  
[1] Tethered [2] Untethered [3] Other \_\_\_\_\_
5. **Farming type:**  
[1] Industrial [2] Biological [3] Other \_\_\_\_\_
6. **Can animal leave the farm building? area, pasture, e.t.c.)**  
[1] Yes (How?) \_\_\_\_\_  
[2] No

### Calves

7. **Place of calving**  
[1] Separate calving space  
[2] Sleep area  
[3] Other \_\_\_\_\_
8. **Age of calf at the separation from dam**  
[1] Right after birth  
[2] Other \_\_\_\_\_
9. **When is colostrum given after birth?**  
[1] Up to 2 h [2] 2- 3 h [3] 3- 4h [4] 4-12h [5] Over 12 h
10. **How much colostrum is given (in liters) on the first time?**  
[1] till 1 [2] 1-2 [3] 2-3 [4] 3-4 [5] Other \_\_\_\_\_
11. **How long is milk given to calves?**  
[1] up to one week [2] 1 - 2 weeks [3] 2-3 weeks [4] 3-4 weeks [5] 1 month [6] 2 months  
[7] 2-3 months [8] over 3 months [8] milk replacer (how long?) \_\_\_\_\_
12. **Are calves held in groups?**  
[1] Yes [2] No (*continue with 15. question*)
13. **At what age are calves moved to group?**  
[1] up to 1 week of age [2] 1-2 weeks old [3] 2-3 weeks old  
[4] 3-4 weeks old [5] 1 month old [6] 2 months old  
[7] Other \_\_\_\_\_
14. **How many calves are held in one group?**  
[1] 1-5 [2] 5-10 [3] 10-15 [4] 15+ [5] Other \_\_\_\_\_
15. **Do calves have diarrhea?**  
[1] Yes [2] No (*continue with 22. question*)
16. **At what age is diarrhea seen in calves? (multiple choice question)**  
[1] up to 7 day old [2] 7-14 day old [3] 14-30 day old [4] above 30 day old  
[5] Other \_\_\_\_\_
17. **Is diarrhea treated?**  
[1] Yes [2] No
18. **Did diarrhea treatment help?**  
[1] Yes [2] No
19. **In which calendar month, does diarrhea flare up?** \_\_\_\_\_
20. **How many percent of calves have diarrhea?**  
[1] 1-2% [1] 2-5% [2] 5-10 % [3] above 10%
21. **Are calves with diarrhea isolated?**  
[1] Yes (How long?) \_\_\_\_\_  
[2] No

### Walking area and pasture

22. **Can animals leave farm house for a walking area?**  
[1] Yes [2] No (*continue with 24. question*)

ID NR \_\_\_\_\_

Date \_\_\_\_\_

23. Is there water body in the walking area, which animals have access to?

[1] Yes [2] No

24. Are animals pastured?

[1] Yes [2] No (*continue with 35. question*)

25. When does pasture season starts?

[1] March [2] April [3] May [4] Other \_\_\_\_\_

26. When does pasture season ends?

[1] September [2] October [3] November [4] Other \_\_\_\_\_

27. Which factors affect the start and end of pasture season? \_\_\_\_\_

28. How often is pasture paddock changed?

[1] Once a month [2] Every two months [3] Every three months [4] Not changed [5] Other \_\_\_\_\_

29. Is there a waterbody in pasture? (*river, pond, lake, ditch*)[1] Yes (which?) \_\_\_\_\_ [2] No (*continue with 32. question*)

30. How far away from pasture is this waterbody? \_\_\_\_\_

31. Can animals access this waterbody?

[1] Yes [2] No

32. Is this waterbody connected to another waterbody? (*Flows to a river, lake, e.t.c.*)

[1] Yes (To where?) \_\_\_\_\_ [2] No

33. How do animals drink water in the pasture? (*multiple choice question*)

[1] Open waterbody (which?) \_\_\_\_\_

[2] Drinking water

[4] None

[4] Other \_\_\_\_\_

**Farm management**

34. How is manure removed from the herd?

[1] Automatically [2] Manually (With what?) \_\_\_\_\_

[3] Both

35. If manual manure cleaning is used, is the equipment cleaned? \_\_\_\_\_

36. How often is sleeping areas cleaned from manure? \_\_\_\_\_

37. How often is individual calf pens/calf group pens cleaned of manure? \_\_\_\_\_

38. Please describe the location of the manure storage

[1] A pile next to herd [2] Open manure pit [3] Closed manure pit (lagoon)

[4] Other \_\_\_\_\_

39. How manure/slurry is disposed of?

[1] Collected by a company

[2] Self use (Where is it used?) \_\_\_\_\_

[3] Sold \_\_\_\_\_

40. Is manure/slurry processed before its utilization/use?

[1] Yes (How?) \_\_\_\_\_

[2] No

41. How often is manure/slurry removed from the farm area \_\_\_\_\_

42. Are manure storages cleaned after manure removal/use (washed)?

[1] Yes (how?) \_\_\_\_\_ [2] No

43. Are the calf boxes disinfected after their stay in the individual boxes and group boxes?

[1] Yes [2] No (*continue with 45. question*)

44. How are the individual boxes disinfected? \_\_\_\_\_

45. How are calf group boxes disinfected? \_\_\_\_\_

ID NR \_\_\_\_\_

Date \_\_\_\_\_

**46. Are the cattle dewormed?**

[1] Yes [2] No

**47. How often are cattle dewormed?**

[1] 1x a year [2] 2x a year [3] Other \_\_\_\_\_

**48. Has the presence of rodents been observed in the farm?**[1] Yes [3] No (*continue with 51. question*)**49. Is rodent control carried out in the farm?**

[1] Yes [2] No

**50. Type of rodent control** (*multiple choice question*)

[1] Poison [2] Mechanical [2] Cat [3] Other \_\_\_\_\_

**51. Is the staff provided with protective equipment (change of shoes)?**

[1] Yes [2] No

**52. Is the veterinarian and other "third" persons provided with a change of shoes or a disinfection mat when entering the herd?**

[1] Yes [2] No

**53. Have the employees had complaints about diarrhea of unknown origin that lasts longer than 3 days?**

[1] Yes [2] No

**54. Do employees have the opportunity to disinfect their hands?**

[1] Yes [2] No

**55. Is there a dry toilet in the herd area?**

[1] Yes [2] No

**Feed****56. What type of feed is used to feed animals?** (*multiple choice question*)

[1] Totally mixed feed [2] Hay [3] Fresh grass [4] Silage [5] Haylage

[6] Other \_\_\_\_\_

**Farm surroundings****57. What is located within a radius of 500-1000m around the farm?** (*multiple choice question*)

[1] Houses [2] Road/Railroad [3] Meadow [4] Forest [5] Bushes

[6] Water reservoir (pond, lakes, river, e.t.c.) [7] agricultural land

**58. Please estimate the distance to the nearest farm with more than 10 cows** \_\_\_\_\_**59. Is there a water reservoir (pond, lake, river, ditches) around the farm area?**

[1] Yes (What type and how far?) \_\_\_\_\_

[2] No

**60. Are there other farm animals on the farm?** (*multiple choice question*)

[1] Horses [2] Sheep [3] Goats [4] Pigs [5] Domestic birds [6] Rabbits [7] No

**61. Are there other pets on the farm?** (*multiple choice question*)

[1] Cats [2] Dogs [3] No [4] Other \_\_\_\_\_

**62. Have wild animals been observed in the vicinity of the herd/pasture?**

[1] Yes (please fill in the table by ticking the appropriate time)

[2] No

| Wild animal species | Time      |             |                      |              |                        |
|---------------------|-----------|-------------|----------------------|--------------|------------------------|
|                     | Every day | Once a week | Once every two weeks | Once a month | Less than once a month |
| Wild boar           |           |             |                      |              |                        |
| Wild ruminants      |           |             |                      |              |                        |
| Wild carnivores     |           |             |                      |              |                        |
| Wild birds          |           |             |                      |              |                        |
